# Supplementary material
Source: publisher figshare collection journal article supplement (https://acs.figshare.com/ndownloader/files/4728547)
Supplement: Supplementary file 1 [file 4728547]

data_DBR-4aa
 
_audit_creation_method            SHELXL-97
_chemical_name_systematic
;
 ?
;
_chemical_name_common             ?
_chemical_melting_point           ?
_chemical_formula_moiety          'C16 H17 N O3'
_chemical_formula_sum
 'C16 H17 N O3'
_chemical_formula_weight          271.31
 
loop_
 _atom_type_symbol
 _atom_type_description
 _atom_type_scat_dispersion_real
 _atom_type_scat_dispersion_imag
 _atom_type_scat_source
 'C'  'C'   0.0033   0.0016
 'International Tables Vol C Tables 4.2.6.8 and 6.1.1.4'
 'H'  'H'   0.0000   0.0000
 'International Tables Vol C Tables 4.2.6.8 and 6.1.1.4'
 'N'  'N'   0.0061   0.0033
 'International Tables Vol C Tables 4.2.6.8 and 6.1.1.4'
 'O'  'O'   0.0106   0.0060
 'International Tables Vol C Tables 4.2.6.8 and 6.1.1.4'
 
_symmetry_cell_setting           'Monoclinic'
_symmetry_space_group_name_H-M   'P2(1)/c  '
 
loop_
 _symmetry_equiv_pos_as_xyz
 'x, y, z'
 '-x, y+1/2, -z+1/2'
 '-x, -y, -z'
 'x, -y-1/2, z-1/2'
 
_cell_length_a                    10.9755(12)
_cell_length_b                    8.2031(9)
_cell_length_c                    16.2285(18)
_cell_angle_alpha                 90.00
_cell_angle_beta                  107.064(2)
_cell_angle_gamma                 90.00
_cell_volume                      1396.8(3)
_cell_formula_units_Z             4
_cell_measurement_temperature     293(2)
_cell_measurement_reflns_used     6663
_cell_measurement_theta_min        2.63
_cell_measurement_theta_max       25.96
 
_exptl_crystal_description        Block
_exptl_crystal_colour             'Pale yellow'
_exptl_crystal_size_max           0.40
_exptl_crystal_size_mid           0.28
_exptl_crystal_size_min           0.16
_exptl_crystal_density_meas       ?
_exptl_crystal_density_diffrn     1.290
_exptl_crystal_density_method     'not measured'
_exptl_crystal_F_000              576
_exptl_absorpt_coefficient_mu     0.089
_exptl_absorpt_correction_type    Multi-scan
_exptl_absorpt_correction_T_min   0.888039
_exptl_absorpt_correction_T_max   0.99       
_exptl_absorpt_process_details    Sadabs
 
_exptl_special_details
;
 ?
;
 
_diffrn_ambient_temperature       293(2)
_diffrn_radiation_wavelength      0.71073
_diffrn_radiation_type            MoK\a
_diffrn_radiation_source          'fine-focus sealed tube'
_diffrn_radiation_monochromator   graphite
_diffrn_measurement_device_type  'CCD area detector'
_diffrn_measurement_method       'phi and omega scans'
_diffrn_detector_area_resol_mean  ?
_diffrn_standards_number          ?
_diffrn_standards_interval_count  ?
_diffrn_standards_interval_time   ?
_diffrn_standards_decay_%         ?
_diffrn_reflns_number             13983
_diffrn_reflns_av_R_equivalents   0.0425
_diffrn_reflns_av_sigmaI/netI     0.0277
_diffrn_reflns_limit_h_min        -13
_diffrn_reflns_limit_h_max        13
_diffrn_reflns_limit_k_min        -10
_diffrn_reflns_limit_k_max        10
_diffrn_reflns_limit_l_min        -19
_diffrn_reflns_limit_l_max        19
_diffrn_reflns_theta_min          1.94
_diffrn_reflns_theta_max          26.03
_reflns_number_total              2736
_reflns_number_gt                 2182
_reflns_threshold_expression      >2sigma(I)
 
_computing_data_collection       'Bruker SMART'
_computing_cell_refinement       'Bruker SMART'
_computing_data_reduction        'Bruker SAINT'
_computing_structure_solution     'SHELXS-97 (Sheldrick, 1990)'
_computing_structure_refinement   'SHELXL-97 (Sheldrick, 1997)'
_computing_molecular_graphics    'Bruker SHELXTL'
_computing_publication_material  'Bruker SHELXTL'
 
_refine_special_details
;
 Refinement of F^2^ against ALL reflections.  The weighted R-factor wR and
 goodness of fit S are based on F^2^, conventional R-factors R are based
 on F, with F set to zero for negative F^2^. The threshold expression of
 F^2^ > 2sigma(F^2^) is used only for calculating R-factors(gt) etc. and is
 not relevant to the choice of reflections for refinement.  R-factors based
 on F^2^ are statistically about twice as large as those based on F, and R-
 factors based on ALL data will be even larger.
;
 
_refine_ls_structure_factor_coef  Fsqd
_refine_ls_matrix_type            full
_refine_ls_weighting_scheme       calc
_refine_ls_weighting_details
 'calc w=1/[\s^2^(Fo^2^)+(0.0737P)^2^+0.2976P] where P=(Fo^2^+2Fc^2^)/3'
_atom_sites_solution_primary      direct
_atom_sites_solution_secondary    difmap
_atom_sites_solution_hydrogens    geom
_refine_ls_hydrogen_treatment     mixed
_refine_ls_extinction_method      none
_refine_ls_extinction_coef        ?
_refine_ls_number_reflns          2736
_refine_ls_number_parameters      188
_refine_ls_number_restraints      0
_refine_ls_R_factor_all           0.0640
_refine_ls_R_factor_gt            0.0516
_refine_ls_wR_factor_ref          0.1404
_refine_ls_wR_factor_gt           0.1326
_refine_ls_goodness_of_fit_ref    1.028
_refine_ls_restrained_S_all       1.028
_refine_ls_shift/su_max           0.000
_refine_ls_shift/su_mean          0.000
 
loop_
 _atom_site_label
 _atom_site_type_symbol
 _atom_site_fract_x
 _atom_site_fract_y
 _atom_site_fract_z
 _atom_site_U_iso_or_equiv
 _atom_site_adp_type
 _atom_site_occupancy
 _atom_site_symmetry_multiplicity
 _atom_site_calc_flag
 _atom_site_refinement_flags
 _atom_site_disorder_assembly
 _atom_site_disorder_group
O1 O 0.15957(13) 1.29650(14) 0.09657(10) 0.0585(4) Uani 1 1 d . . .
H1 H 0.1163 1.3684 0.1091 0.088 Uiso 1 1 calc R . .
O3 O 0.01468(13) 0.54556(16) 0.13257(10) 0.0625(4) Uani 1 1 d . . .
C4 C 0.01951(15) 0.83732(19) 0.12105(11) 0.0407(4) Uani 1 1 d . . .
N1 N 0.27980(14) 1.0394(2) 0.05524(10) 0.0467(4) Uani 1 1 d . . .
O2 O -0.15917(12) 0.68917(15) 0.12585(10) 0.0618(4) Uani 1 1 d . . .
C5 C 0.12663(15) 0.85556(19) 0.09066(10) 0.0391(4) Uani 1 1 d . . .
C6 C 0.17268(15) 1.0125(2) 0.08599(10) 0.0405(4) Uani 1 1 d . . .
C2 C 0.00872(17) 1.1285(2) 0.13914(12) 0.0477(4) Uani 1 1 d . . .
H2 H -0.0297 1.2185 0.1559 0.057 Uiso 1 1 calc R . .
C10 C 0.40437(15) 1.0293(2) 0.11112(11) 0.0413(4) Uani 1 1 d . . .
C3 C -0.03693(17) 0.9746(2) 0.14513(11) 0.0453(4) Uani 1 1 d . . .
H3 H -0.1070 0.9615 0.1657 0.054 Uiso 1 1 calc R . .
C1 C 0.11187(16) 1.14855(19) 0.10823(11) 0.0428(4) Uani 1 1 d . . .
C7 C -0.03786(17) 0.6759(2) 0.12701(12) 0.0452(4) Uani 1 1 d . . .
C16 C 0.18917(18) 0.7144(2) 0.05972(13) 0.0509(5) Uani 1 1 d . . .
H16A H 0.2421 0.7546 0.0265 0.076 Uiso 1 1 calc R . .
H16B H 0.1248 0.6440 0.0246 0.076 Uiso 1 1 calc R . .
H16C H 0.2405 0.6545 0.1084 0.076 Uiso 1 1 calc R . .
C11 C 0.43443(17) 0.9411(2) 0.18745(12) 0.0526(5) Uani 1 1 d . . .
H11 H 0.3703 0.8883 0.2040 0.063 Uiso 1 1 calc R . .
C15 C 0.50287(17) 1.1053(2) 0.08850(13) 0.0527(5) Uani 1 1 d . . .
H15 H 0.4849 1.1640 0.0373 0.063 Uiso 1 1 calc R . .
C12 C 0.55861(19) 0.9315(3) 0.23875(13) 0.0661(6) Uani 1 1 d . . .
H12 H 0.5775 0.8717 0.2896 0.079 Uiso 1 1 calc R . .
C14 C 0.62643(18) 1.0953(3) 0.14041(15) 0.0634(6) Uani 1 1 d . . .
H14 H 0.6911 1.1475 0.1242 0.076 Uiso 1 1 calc R . .
C8 C -0.2260(2) 0.5417(3) 0.13738(16) 0.0692(6) Uani 1 1 d . . .
H8A H -0.1992 0.4509 0.1086 0.083 Uiso 1 1 calc R . .
H8B H -0.2062 0.5160 0.1982 0.083 Uiso 1 1 calc R . .
C13 C 0.65517(19) 1.0086(3) 0.21638(14) 0.0675(6) Uani 1 1 d . . .
H13 H 0.7387 1.0023 0.2519 0.081 Uiso 1 1 calc R . .
C9 C -0.3598(2) 0.5675(3) 0.1019(2) 0.1082(11) Uani 1 1 d . . .
H9A H -0.3853 0.6591 0.1297 0.162 Uiso 1 1 calc R . .
H9B H -0.4049 0.4720 0.1108 0.162 Uiso 1 1 calc R . .
H9C H -0.3792 0.5886 0.0412 0.162 Uiso 1 1 calc R . .
H1A H 0.2698(18) 1.118(3) 0.0225(13) 0.054(6) Uiso 1 1 d . . .
 
loop_
 _atom_site_aniso_label
 _atom_site_aniso_U_11
 _atom_site_aniso_U_22
 _atom_site_aniso_U_33
 _atom_site_aniso_U_23
 _atom_site_aniso_U_13
 _atom_site_aniso_U_12
O1 0.0578(8) 0.0347(7) 0.0838(10) -0.0018(6) 0.0220(7) -0.0040(6)
O3 0.0607(9) 0.0378(7) 0.0943(11) 0.0050(7) 0.0310(8) 0.0042(6)
C4 0.0371(9) 0.0371(9) 0.0456(9) 0.0001(7) 0.0087(7) 0.0020(7)
N1 0.0398(8) 0.0474(9) 0.0522(9) 0.0120(7) 0.0122(7) 0.0013(7)
O2 0.0459(8) 0.0431(7) 0.1013(11) 0.0058(7) 0.0294(7) -0.0035(6)
C5 0.0366(9) 0.0374(9) 0.0409(9) 0.0012(7) 0.0076(7) 0.0040(7)
C6 0.0340(9) 0.0413(9) 0.0427(9) 0.0038(7) 0.0060(7) 0.0028(7)
C2 0.0469(10) 0.0384(9) 0.0569(11) -0.0062(8) 0.0136(8) 0.0073(7)
C10 0.0383(9) 0.0374(9) 0.0483(9) -0.0037(7) 0.0130(7) 0.0022(7)
C3 0.0394(9) 0.0437(10) 0.0541(10) -0.0004(8) 0.0156(8) 0.0031(7)
C1 0.0403(9) 0.0345(9) 0.0488(10) 0.0003(7) 0.0057(7) -0.0019(7)
C7 0.0436(10) 0.0403(10) 0.0515(10) 0.0008(7) 0.0139(8) 0.0010(7)
C16 0.0515(11) 0.0425(10) 0.0627(12) -0.0006(8) 0.0229(9) 0.0046(8)
C11 0.0432(10) 0.0628(12) 0.0532(11) 0.0075(9) 0.0165(8) 0.0018(8)
C15 0.0488(11) 0.0500(11) 0.0606(11) 0.0053(9) 0.0180(9) -0.0012(8)
C12 0.0522(12) 0.0909(16) 0.0529(12) 0.0125(11) 0.0121(9) 0.0105(11)
C14 0.0402(11) 0.0734(14) 0.0797(15) -0.0015(11) 0.0224(10) -0.0061(9)
C8 0.0585(13) 0.0539(12) 0.0970(17) 0.0067(11) 0.0254(12) -0.0148(10)
C13 0.0377(10) 0.0974(17) 0.0636(13) -0.0034(12) 0.0088(9) 0.0060(10)
C9 0.0622(16) 0.0770(18) 0.172(3) 0.0300(19) 0.0131(18) -0.0186(13)
 
_geom_special_details
;
 All esds (except the esd in the dihedral angle between two l.s. planes)
 are estimated using the full covariance matrix.  The cell esds are taken
 into account individually in the estimation of esds in distances, angles
 and torsion angles; correlations between esds in cell parameters are only
 used when they are defined by crystal symmetry.  An approximate (isotropic)
 treatment of cell esds is used for estimating esds involving l.s. planes.
;
 
loop_
 _geom_bond_atom_site_label_1
 _geom_bond_atom_site_label_2
 _geom_bond_distance
 _geom_bond_site_symmetry_2
 _geom_bond_publ_flag
O1 C1 1.3568(19) . ?
O3 C7 1.206(2) . ?
C4 C3 1.395(2) . ?
C4 C5 1.410(2) . ?
C4 C7 1.481(2) . ?
N1 C10 1.404(2) . ?
N1 C6 1.423(2) . ?
O2 C7 1.330(2) . ?
O2 C8 1.455(2) . ?
C5 C6 1.393(2) . ?
C5 C16 1.506(2) . ?
C6 C1 1.401(2) . ?
C2 C3 1.372(2) . ?
C2 C1 1.376(3) . ?
C10 C15 1.388(2) . ?
C10 C11 1.388(3) . ?
C11 C12 1.375(3) . ?
C15 C14 1.373(3) . ?
C12 C13 1.371(3) . ?
C14 C13 1.378(3) . ?
C8 C9 1.427(3) . ?
 
loop_
 _geom_angle_atom_site_label_1
 _geom_angle_atom_site_label_2
 _geom_angle_atom_site_label_3
 _geom_angle
 _geom_angle_site_symmetry_1
 _geom_angle_site_symmetry_3
 _geom_angle_publ_flag
C3 C4 C5 119.77(15) . . ?
C3 C4 C7 118.10(15) . . ?
C5 C4 C7 122.12(14) . . ?
C10 N1 C6 120.84(15) . . ?
C7 O2 C8 118.08(14) . . ?
C6 C5 C4 118.04(14) . . ?
C6 C5 C16 118.98(15) . . ?
C4 C5 C16 122.92(15) . . ?
C5 C6 C1 120.95(15) . . ?
C5 C6 N1 120.83(15) . . ?
C1 C6 N1 118.17(15) . . ?
C3 C2 C1 119.51(16) . . ?
C15 C10 C11 118.08(16) . . ?
C15 C10 N1 119.29(16) . . ?
C11 C10 N1 122.59(16) . . ?
C2 C3 C4 121.42(16) . . ?
O1 C1 C2 123.39(15) . . ?
O1 C1 C6 116.37(15) . . ?
C2 C1 C6 120.24(15) . . ?
O3 C7 O2 121.88(16) . . ?
O3 C7 C4 126.47(16) . . ?
O2 C7 C4 111.64(14) . . ?
C12 C11 C10 120.25(18) . . ?
C14 C15 C10 121.12(18) . . ?
C13 C12 C11 121.3(2) . . ?
C15 C14 C13 120.36(19) . . ?
C9 C8 O2 108.85(18) . . ?
C12 C13 C14 118.89(19) . . ?
 
_diffrn_measured_fraction_theta_max    0.995
_diffrn_reflns_theta_full              26.03
_diffrn_measured_fraction_theta_full   0.995
_refine_diff_density_max    0.192
_refine_diff_density_min   -0.247
_refine_diff_density_rms    0.067
#=========================================
